# Supplementary material for: Bank vole genomics links determinate and indeterminate growth of teeth
Source: PubMed Central journal article supplement (PMC11523675; doi:10.1186/s12864-024-10901-2), 2024-10-30
Supplement: 12864_2024_10901_MOESM7_ESM.pdf [file 12864_2024_10901_MOESM7_ESM.pdf]

## Supplementary Material 7: Oligonucleotide primers

Primer sequences used for qPCR analyses of expression in bank vole and prairie vole M1 at three embryonic days.

Bank vole (*Myodes glareolus*, rooted molars)

Aqp1\_forward: GGGCATTGAGATCATCGGCA

Aqp1\_reverse: CCAGTGTAGTCAATCGCCAG

Dspp\_forward: AGGAACTCCAGCACAGAATGA

Dspp\_reverse: TCGTCCCTCCTACGTCTGTT

GAPDH\_forward: GTGGGCAAAGTCATCCCAGA

GAPDH\_reverse: GTGTAGCCCTTGATGCCCTT

Prairie vole (*Microtus ochrogaster*, unrooted molars)

Aqp1\_forward: GCTCCTGCTCAGTTGTCAGAT

Aqp1\_reverse: CACACCTCGAGCCAGGTCATT

Dspp\_forward: GGA ACTCCAGCACAGGATGA

Dspp\_reverse: TCGTCCCTCCTACGTCTGTT

GAPDH\_forward: TGGAGACAGCCGCTTCTTTT

GAPDH\_reverse: GCGTCCAATACGGCCAAATC
